# Supplementary material
Source: Springer Nature journal article supplement (https://www.springermedizin.de/resource/supplementary/12916_2010_310_MOESM4_ESM.pdf/9599608)

### MMRM Global treatment effect p=0.002

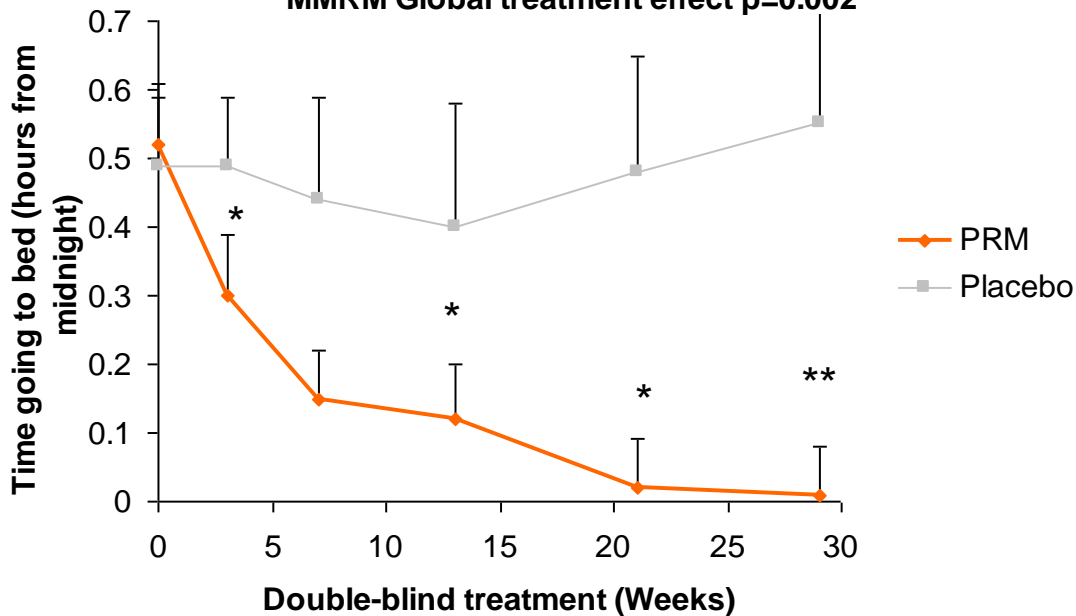

|           |     |     |     |     |     |
|-----------|-----|-----|-----|-----|-----|
| N PRM     | 137 | 191 | 181 | 168 | 159 |
| N Placebo | 144 | 73  | 62  | 63  | 61  |
| N Total   | 281 | 264 | 243 | 231 | 220 |

Supplement: MOESM4 [file 9599608]
